# Supplementary material
Source: Springer Nature journal article supplement (https://www.springermedizin.de/resource/supplementary/12889_2011_3966_MOESM3_ESM.pdf/9491164)
Supplement: MOESM3 [file 9491164]

Table 1 Characteristics of the study variables. The Health 2000 Study, n=3471.

|                                               | n (%)           |                   |                 | <i>P</i> for gender difference |
|-----------------------------------------------|-----------------|-------------------|-----------------|--------------------------------|
|                                               | Men<br>(n=1695) | Women<br>(n=1776) | All<br>(n=3471) |                                |
| Number of participants living alone           | 244 (14.4)      | 260 (14.6)        | 504 (14.5)      | 0.838                          |
| Number of antidepressant users:               |                 |                   |                 |                                |
| At baseline                                   | 75 (4.4)        | 140 (7.9)         | 215 (6.2)       | <0.001                         |
| During 7-year follow-up                       | 235 (13.9)      | 362 (20.4)        | 597 (17.2)      | <0.001                         |
| Incident users during 7-year follow-up        | 175 (10.3)      | 245 (13.8)        | 420 (12.1)      | 0.002                          |
| Psychosocial factors: <sup>a</sup>            |                 |                   |                 |                                |
| Poor job climate                              | 622 (36.7)      | 604 (34.0)        | 1226 (35.3)     | 0.098                          |
| Lack of support at the workplace              | 618 (36.5)      | 551 (31.0)        | 1169 (33.7)     | 0.001                          |
| Lack of social support in private life        | 600 (35.4)      | 626 (35.2)        | 1226 (35.3)     | 0.926                          |
| High cynical hostility                        | 455 (26.8)      | 466 (26.2)        | 921 (26.5)      | 0.687                          |
| Sociodemographic factors:                     |                 |                   |                 |                                |
| Low occupational grade (blue-collar)          | 753 (44.4)      | 431 (24.3)        | 1184 (34.1)     | <0.001                         |
| Lack of secondary education                   | 387 (22.8)      | 384 (21.6)        | 771 (22.2)      | 0.391                          |
| Low income (<50% of national median)          | 182 (10.7)      | 213 (12.0)        | 395 (11.4)      | 0.244                          |
| Temporarily outside working life <sup>b</sup> | 122 (7.2)       | 170 (9.6)         | 292 (8.4)       | 0.012                          |
| Urban residency                               | 1058 (62.4)     | 1193 (67.2)       | 2251 (64.9)     | 0.003                          |
| Living at rent                                | 379 (22.4)      | 402 (22.6)        | 781 (22.5)      | 0.846                          |
| Poor housing conditions <sup>c</sup>          | 152 (9.0)       | 185 (10.4)        | 337 (9.7)       | 0.149                          |
| Health behaviors:                             |                 |                   |                 |                                |
| Daily smokers                                 | 490 (28.9)      | 380 (21.4)        | 870 (25.1)      | <0.001                         |
| Heavy alcohol use <sup>d</sup>                | 241 (14.2)      | 135 (7.6)         | 376 (10.8)      | <0.001                         |
| Infrequent physical activity <sup>e</sup>     | 336 (19.8)      | 424 (23.9)        | 760 (21.9)      | 0.004                          |
| Obesity (BMI≥30)                              | 310 (18.3)      | 340 (19.1)        | 650 (18.7)      | 0.519                          |

<sup>a</sup>The highest tertile is the cut-off point.

<sup>b</sup>Unemployed, home-maker, full-time student, or retired during past 12 months.

<sup>c</sup>At least 2 of the following: draft, noise, dust or dirt, dampness, chilliness, crowding, fear.

<sup>d</sup>According to WHO definition: >20g for women per day, >40g for men per day

<sup>e</sup>Less than 4 times per week of any activity, including moderate activity such as walking
